# Supplementary material for: Prognostic value and clinicopathological features of PD-1/PD-L1 expression with mismatch repair status and desmoplastic stroma in Chinese patients with pancreatic cancer
Source: PubMed Central journal article supplement (PMC5354736; doi:10.18632/oncotarget.14069), 2016-12-21
Supplement: oncotarget-08-9354-s001.pdf [file oncotarget-08-9354-s001.pdf]

## Prognostic value and clinicopathological features of PD-1/PD-L1 expression with mismatch repair status and desmoplastic stroma in Chinese patients with pancreatic cancer

### Supplementary Materials

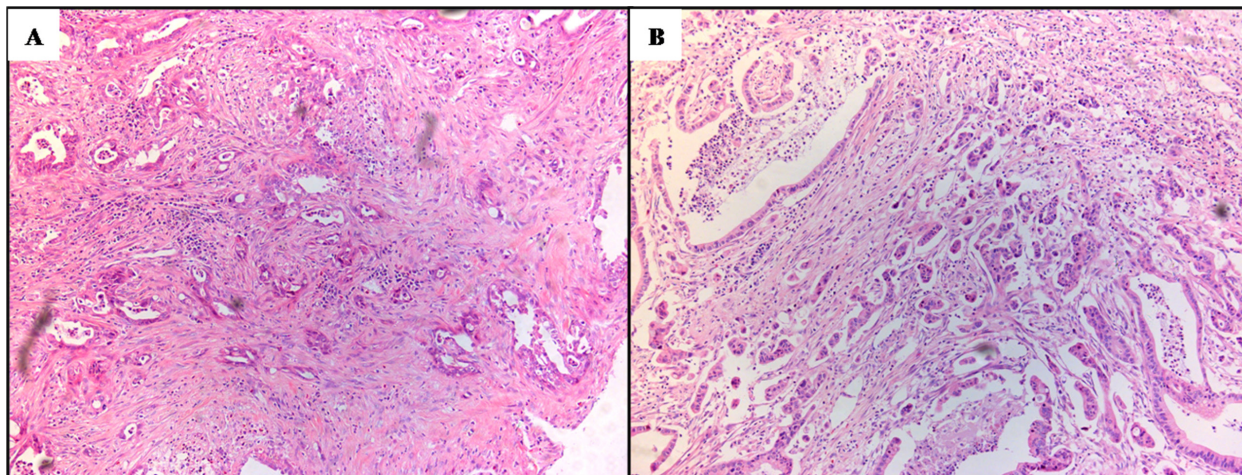

**Supplementary Figure S1: H&E staining of stroma density.** (A) H&E staining showed PC tissue with dense stroma. (B) H&E staining showed PC tissue with moderate stroma. Magnification,  $\times 100$ .

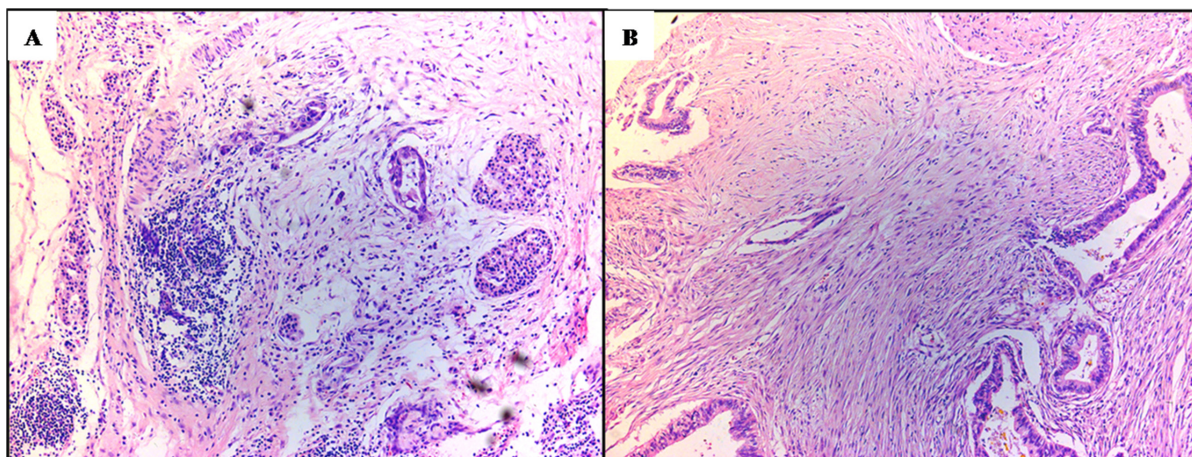

**Supplementary Figure S2: H&E staining of T lymphocytes (TLCs) density.** (A) high density of TLCs: abundant occurrence of T-cells; (B) low density of TLCs: sporadic T-cells. Magnification,  $\times 100$ .

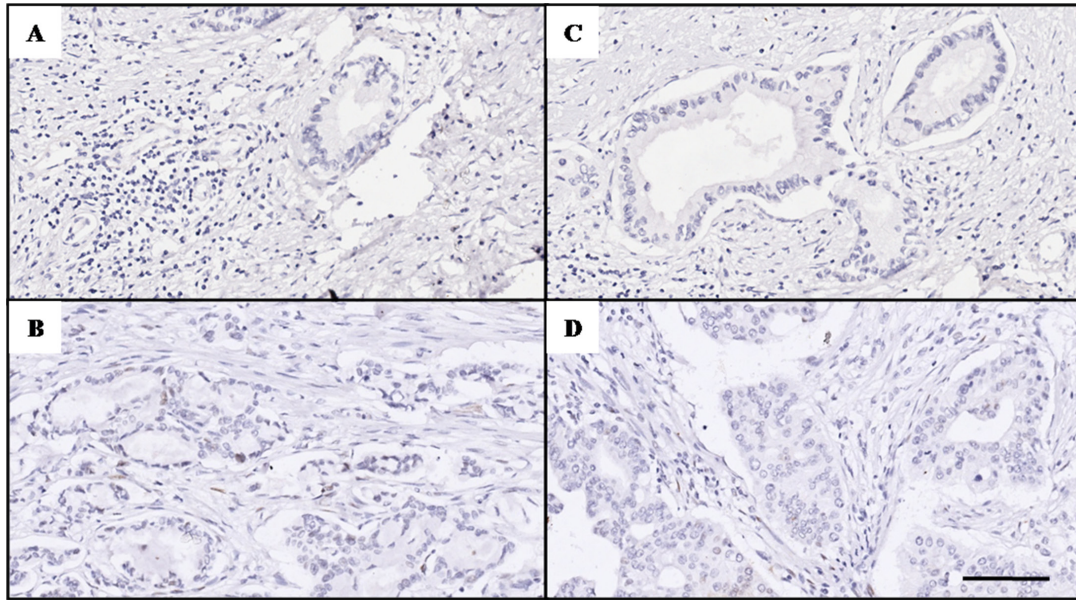

**Supplementary Figure S3: Immunohistochemical staining of negative control for PD-1.** (A) PD-L1 (B) MLH1 (C) and MSH2 (D) in PC tissues. Scale bar, 50  $\mu\text{m}$ .

**Supplementary Table S1: Association between TLC and other markers**

|            | TLC                 |                      | Pearson<br><i>P</i> value  | Spearman<br><i>P</i> value |
|------------|---------------------|----------------------|----------------------------|----------------------------|
|            | Low ( <i>n</i> , %) | High ( <i>n</i> , %) |                            |                            |
| Low MLH1   | 17 (50.0%)          | 17 (50.0%)           | <i>R</i> = -0.064          | <i>R</i> = -0.064          |
| High MLH1  | 34 (56.7%)          | 26 (25.0%)           | <i>P</i> = 0.538           | <i>P</i> = 0.538           |
| Low MSH2   | 8 (34.8%)           | 15 (65.2%)           | <i>R</i> = -0.222          | <i>R</i> = -0.222          |
| High MSH2  | 43 (60.6%)          | 28 (39.4%)           | <b><i>P</i> = 0.031</b>    | <b><i>P</i> = 0.031</b>    |
| Low PD-1   | 39 (78.0%)          | 11 (22.0%)           | <i>R</i> = 0.508           | <i>R</i> = 0.508           |
| High PD-1  | 12 (27.3%)          | 32 (72.7%)           | <b><i>P</i> &lt; 0.001</b> | <b><i>P</i> &lt; 0.001</b> |
| Low PD-L1  | 40 (59.7%)          | 27 (40.3%)           | <i>R</i> = 0.172           | <i>R</i> = 0.172           |
| High PD-L1 | 11 (40.7%)          | 16 (59.3%)           | <i>P</i> = 0.097           | <i>P</i> = 0.097           |

Significant values ( $P < 0.05$ ) have been marked with bold.

**Supplementary Table S2: Correlation between the clinicopathologic characteristics and TLC**

|                   | TLC        |            | <i>P</i> value     |
|-------------------|------------|------------|--------------------|
|                   | Low dense  | High dense |                    |
| Age               |            |            |                    |
| < 60 years        | 15 (51.7%) | 14 (48.3%) | 0.742 <sup>a</sup> |
| ≥ 60 years        | 36 (55.4%) | 29 (44.6%) |                    |
| Gender            |            |            |                    |
| Male              | 37 (58.7%) | 26 (41.3%) | 0.068 <sup>a</sup> |
| Female            | 12 (38.7%) | 19 (61.3%) |                    |
| Tumor site        |            |            |                    |
| Head, neck        | 24 (50.0%) | 24 (50.0%) | 0.333 <sup>a</sup> |
| Body, tail        | 27 (60.0%) | 18 (40.0%) |                    |
| T stage           |            |            |                    |
| T1+T2             | 9 (45.0%)  | 11 (55.0%) | 0.318 <sup>a</sup> |
| T3+T4             | 42 (57.5%) | 31 (42.5%) |                    |
| N stage           |            |            |                    |
| N0 (negative)     | 22 (55.0%) | 18 (45.0%) | 0.978 <sup>a</sup> |
| N1 (positive)     | 29 (54.7%) | 24 (45.3%) |                    |
| Metastasis        |            |            |                    |
| M0 (absent)       | 50 (56.2%) | 39 (43.8%) | 0.220 <sup>b</sup> |
| M1 (present)      | 1 (25.0%)  | 3 (75.0%)  |                    |
| Differentiation   |            |            |                    |
| G1 and G2         | 33 (54.1%) | 28 (45.9%) | 0.967 <sup>a</sup> |
| G3                | 18 (54.5%) | 15 (45.5%) |                    |
| Vascular invasion |            |            |                    |
| No                | 44 (54.3%) | 37 (45.7%) | 0.794 <sup>a</sup> |
| Yes               | 7 (58.3%)  | 5 (41.7%)  |                    |
| Nervous invasion  |            |            |                    |
| No                | 15 (53.6%) | 13 (47.4%) | 0.872 <sup>a</sup> |
| Yes               | 36 (55.4%) | 29 (44.6%) |                    |

<sup>a</sup>Chi-square test; <sup>b</sup>Fisher's exact test.
